# Supplementary material
Source: PubMed Central journal article supplement (PMC3155159)
Supplement: mmc1.pdf [file mmc1.pdf]

Supplemental Data

***KIF1A*, an Axonal Transporter of Synaptic Vesicles,  
Is Mutated in Hereditary Sensory  
and Autonomic Neuropathy Type 2**

Jean-Baptiste Rivière, Siriram Ramalingam, Valérie Lavastre, Masoud Shekarabi, Sébastien Holbert, Julie Lafontaine, Myriam Srouf, Nancy Merner, Daniel Rochefort, Pascale Hince, Rébecca Gaudet, Anne-Marie Mes-Masson, Jonathan Baets, Henry Houlden, Bernard Brais, Garth A. Nicholson, Hilde Van Esch, Shahriar Nafissi, Peter De Jonghe, Mary M. Reilly, Vincent Timmerman, Patrick A. Dion, and Guy A. Rouleau

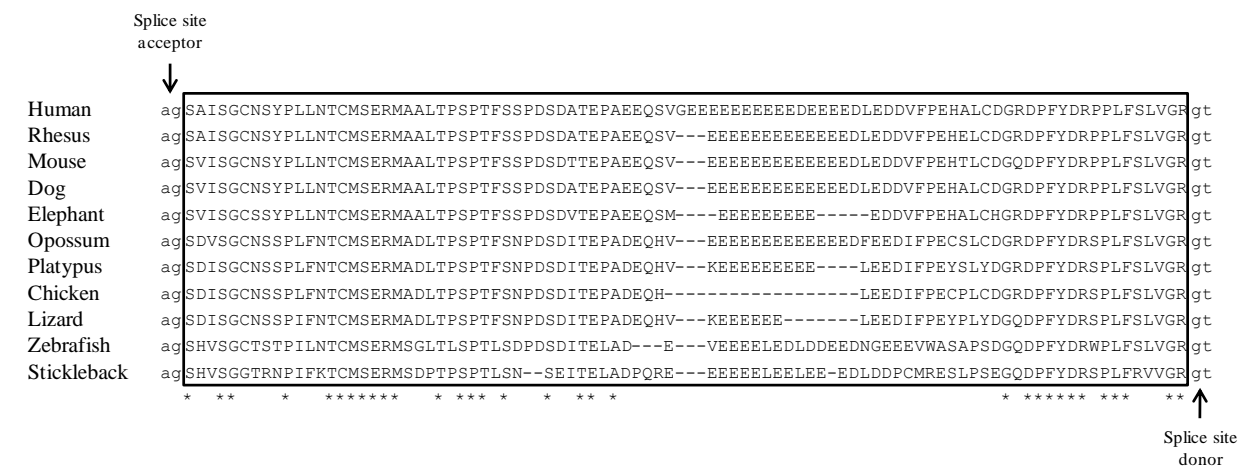

**Figure S1.** Conservation across species of splice acceptor/donor sites and amino acid sequence of exon 25b. Asterisks below the residues indicate amino acids fully conserved across the different species.

**Table S1.** Primer sequences for *KIF1A* screening, and characterization of the *KIF1A* exon 25b-containing isoform.

| Exon  | Template    | Forward Primer       | Reverse Primer         |
|-------|-------------|----------------------|------------------------|
| 2     | Genomic DNA | CTGTCCTGCCTCCTCAGATA | CCCATAGGCACAGGACCAT    |
| 3     | Genomic DNA | TCCCCACCTTGGAGTGTAGA | AGCGGCTCAGAGAAGTTGAG   |
| 4     | Genomic DNA | GCAGACATGATGGGCTGAG  | CCTCCTGACTCCCTGTCT     |
| 5     | Genomic DNA | CACAGGCTGCCCACAGTAT  | GGCACTCACTTTGCATCAGA   |
| 6     | Genomic DNA | CATCTCCTCACTCAGGGGTC | GAGGTGAAGGGGCTTCCTC    |
| 7     | Genomic DNA | ATGACCTGGTTCAGAGGGCT | GACCACCACCCTACCCT      |
| 8     | Genomic DNA | AACAGCTGTGGAGACCTTGC | CTCCTGCCACCCACTCTG     |
| 9     | Genomic DNA | GTGGCCTCCACTCCACAC   | CGGAAACGAGGGTGACAG     |
| 10    | Genomic DNA | AGACCACGGGGTGGTAGAG  | GCCAATGCAGGGCAGAC      |
| 11    | Genomic DNA | CAGCTTTGAGGACCCACTTG | AGTGGGAAGAAGGGCAC      |
| 12    | Genomic DNA | CAGCCTCCCATCTGTAAT   | TGGTCACTGGTGCTTCCTAA   |
| 13    | Genomic DNA | CTCTAGGCACCTTGGGAC   | CCCAGGAGAGAGGATGTGAT   |
| 13b   | Genomic DNA | TGACCCTCTGGAGACAAACC | GTTCACCCCTCCCTGACC     |
| 14    | Genomic DNA | CCATAGACGTGTCCGACCTT | TGCCTCTCTAACTCCTCCGA   |
| 15    | Genomic DNA | GAATATGGCGCTTGTGCTTT | AGGGCTCAGTGCTCATCCT    |
| 16    | Genomic DNA | CCCCATTGGTCAGCCAG    | GTGCTCCCTACTTCCAGG     |
| 17_18 | Genomic DNA | GGTAGTCTGGTGCCTGGAGA | TTAGTGCTGGGTAAGCTGGG   |
| 19    | Genomic DNA | AGGGAAAAGAGAGGCGAGAG | CTTGGACATGGGAACAGAGG   |
| 20_21 | Genomic DNA | CCCTTCTCCTCACGCCT    | TTAGATGCAAGAGATGGGGC   |
| 22    | Genomic DNA | CTGTCTAGGCGCAGTGTGAG | GCAAAAAGTGCTGACCAGTGA  |
| 23    | Genomic DNA | CACAGGGTCAGCTTAGGCA  | CAAGTAGCTGTCCCGTCAT    |
| 24    | Genomic DNA | TGAAATCTCCAGAAGGTGGG | CTGCAGGTACTIONGCTGTGAA |
| 25    | Genomic DNA | CCACTGTCCCCAGGAGATAA | TGGAAAAGCACTTGTGAGGG   |
| 25b   | Genomic DNA | TAAAGCAGCATTCTCGATGG | AGCGGTTCTCTGTGCC       |
| 26    | Genomic DNA | TTTGCAGCTCCATGTTGTGT | CCTCTGCCTGCAAAGGTC     |
| 27    | Genomic DNA | CCTGTGCCCTCACTTTGACT | CAGGGGTGTTAGAGGAGCAA   |
| 28_29 | Genomic DNA | GTGGCAGGGTCTACGGTG   | CAACACAGCACCAACATGG    |
| 30    | Genomic DNA | GTGGGTTCACCTGGTAAGG  | AGAAGAGGGAGAATGAGCCA   |
| 31    | Genomic DNA | TGATGTGACTCTCCTCCCC  | GCTGGATGAAAAGATCTGGG   |
| 32    | Genomic DNA | CCTGTAGCCCTTCTGTCTCC | ACAGCCCAGTCACAGAGGAC   |
| 33    | Genomic DNA | GGCATCTCCTCTTGAGTGT  | GGAAGAACCACTCTGGATGC   |
| 34_35 | Genomic DNA | GTCCACTGTGTCCTGTGCTG | CAGACGCAGAGGTGTGGTTA   |
| 36    | Genomic DNA | AGCTGGCTTGTGACAGG    | GTCACCTTGTGTGGCTGAAC   |
| 36b   | Genomic DNA | GCCGGTGCTTGTCTGAC    | CCGAGGAGAAAGGAACCTCG   |
| 37    | Genomic DNA | CCCTTGTCTGTGCTCTGTG  | TCTGGGTCATATGGGGTTGT   |
| 38    | Genomic DNA | AGAAGGCTGGAAGGGCAC   | GAGTGTGGCTGGGCCTC      |

|              |             |                             |                           |
|--------------|-------------|-----------------------------|---------------------------|
| 39           | Genomic DNA | GGCTGACTGTGCGTTTGATA        | AAATGGCAGCTTCGCTGT        |
| 40           | Genomic DNA | AGAGGGGAGACAGCTTCACA        | CTCCAGCTTTTGCTCTGCAC      |
| 41           | Genomic DNA | GCTGAGGCTGAGCACAAC          | GGAGTTGCCAGAAATGACT       |
| 42           | Genomic DNA | AGGGGTGGGTAGAAGAGCCT        | AATGGGAGTTTTCTCAGGG       |
| 43           | Genomic DNA | TAAGCAGCAGGTGTGGGGTA        | GTGCTCTCTGTGCCGAGT        |
| 44           | Genomic DNA | TGAGGAGGGTGAAGCCTG          | TGTCTCCCAAGTATGAGGG       |
| 45           | Genomic DNA | GTGGTAGATGGTGAGTGCCC        | GAGTCTGGGGTGAGCAGATG      |
| 46           | Genomic DNA | GGGACTTTCCTGGCAGTG          | CAGCAGGGCCCTATCAAAT       |
| 47           | Genomic DNA | CAGGGCACGGTGGATATG          | GCTGTCTGGCAGGAGAGG        |
| 2 to 25b     | cDNA        | GGCCGGGGCTTCGGTGAA          | GAGTCGGGGCTCGAGAAGGTG     |
| 24 to 25b    | cDNA        | AAGAACGGGGCCACCCACTACT      | GAGTCGGGGCTCGAGAAGGTG     |
| 25b to 26_27 | cDNA        | CGGCCGGGACCCGTTTTAC         | GGGCTCTTCATCGGCTGAG       |
| 25b to 47    | cDNA        | CGGCCGGGACCCGTTTTAC         | CGCATCTGGGCAGACCTCCTTC    |
| 25_26 to 27  | cDNA (qPCR) | TGGTTCCGGCTGGTGGGCAGGG      | GGCGGACGCCAGAGCCATAATCAGG |
| 25b to 27    | cDNA (qPCR) | CCCCTGTTCAAGTTTAGTAGGAAGGGC | GGCGGACGCCAGAGCCATAATCAGG |
| POLR2A       | cDNA (qPCR) | CCCCGCTCCATTGCTGCCAA        | GTGCAGAGTTGGCTGCCGGT      |
